# Supplementary material for: Enhanced photocatalytic activity of TiO2 activated by doping Zr and modifying Pd
Source: Royal Society of Chemistry journal article supplement (doi:10.1039/c6ra03275c), 2016-01-01
Supplement: c6ra03275c1.pdf [file c6ra03275c1.pdf]

***ESI***

## **Enhanced photocatalytic activity of TiO<sub>2</sub> activated by doping Zr and modifying Pd**

Shaolong Huang<sup>a</sup>, Yanlong Yu<sup>c</sup>, Yabin Yan<sup>a</sup>, Jixiang Yuan<sup>a</sup>, Shougen Yin<sup>\*b</sup> and Yaan Cao<sup>\*a</sup>

<sup>a</sup>The Key Laboratory of Weak-Light Nonlinear Photonics, Ministry of Education, TEDA Applied Physics Institute and School of Physics, Nankai University, Tianjin 300457, China

<sup>b</sup>Key Laboratory of Display Materials and Photoelectric Devices (Ministry of Education); Institute of Material Physics, and Tianjin Key Laboratory for Photoelectric Materials and Devices, Tianjin University of Technology, Tianjin 300384, China

<sup>c</sup>College of Chemistry, Department of Materials Chemistry, Nankai University, Tianjin 300457, China

\*To whom correspondence should be addressed. E-mail: caoya@nankai.edu.cn, sgyin@tjut.edu.cn.

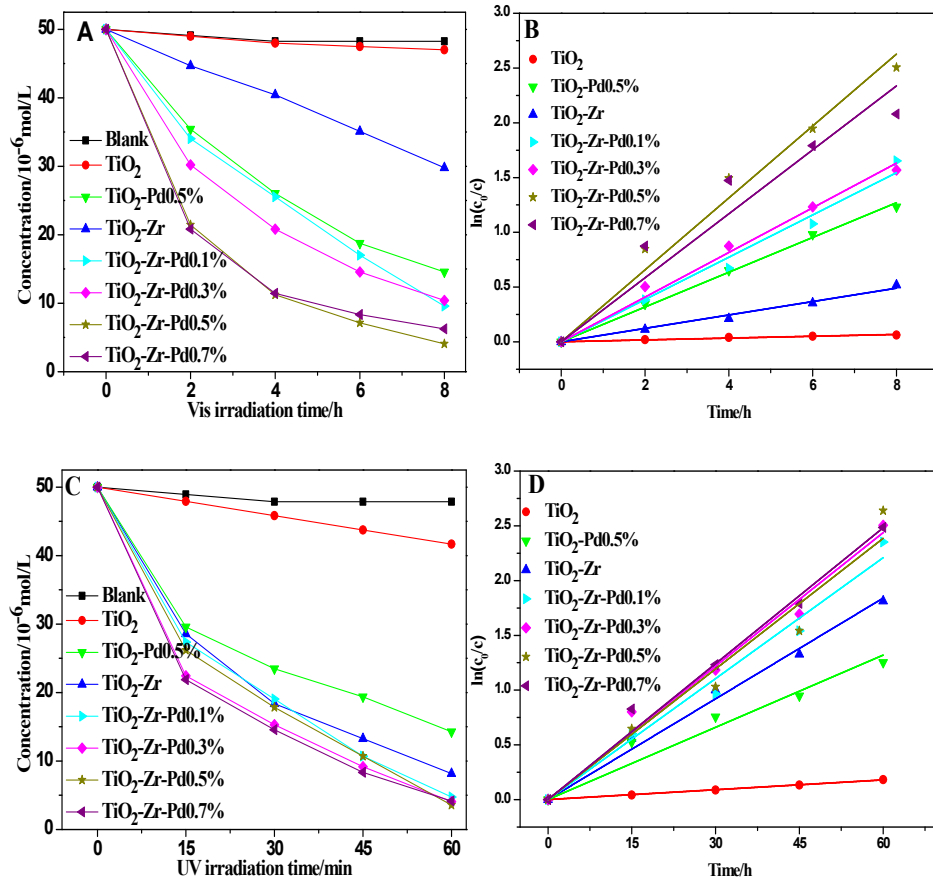

**Figure S1.** Photodegradation of 4-CP (A is under Vis irradiation and C is under UV irradiation) and relationship of  $\ln(c_0/c)$  to reaction time (B is under Vis irradiation and D is under UV irradiation) for TiO<sub>2</sub>, TiO<sub>2</sub>-Pd0.5%, TiO<sub>2</sub>-Zr and TiO<sub>2</sub>-Zr-Pdx samples.

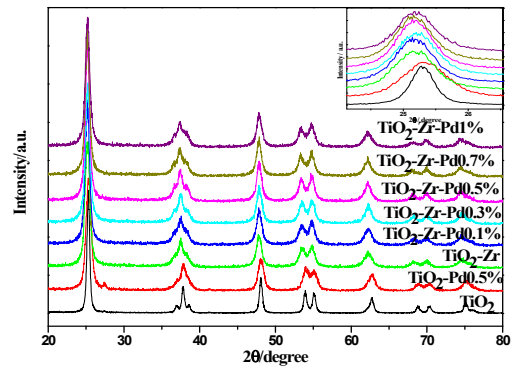

**Figure S2.** XRD patterns of  $\text{TiO}_2$ ,  $\text{TiO}_2\text{-Pd}0.5\%$ ,  $\text{TiO}_2\text{-Zr}$  and  $\text{TiO}_2\text{-Zr-Pd}_x$  samples. The inset is the enlargement of the XRD peaks for the (1 0 1) plane.

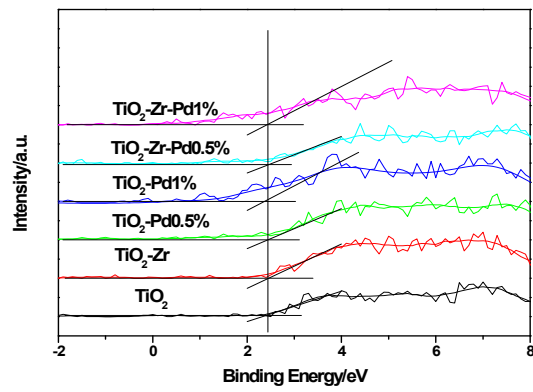

**Figure S3.** XPS valence band spectra for  $\text{TiO}_2$ ,  $\text{TiO}_2\text{-Zr}$ ,  $\text{TiO}_2\text{-Pd}0.5\%$ ,  $\text{TiO}_2\text{-Pd}1\%$ ,  $\text{TiO}_2\text{-Zr-Pd}0.5\%$  and  $\text{TiO}_2\text{-Zr-Pd}1\%$  samples.

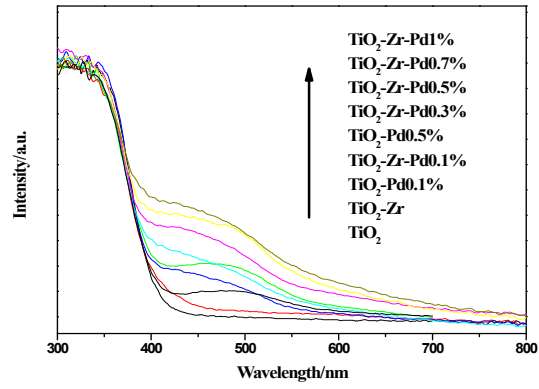

**Figure S4.** Diffuse reflectance UV-vis absorption spectra for  $\text{TiO}_2$ ,  $\text{TiO}_2\text{-Pd}0.1\%$ ,  $\text{TiO}_2\text{-Pd}0.5\%$ ,  $\text{TiO}_2\text{-Zr}$  and  $\text{TiO}_2\text{-Zr-Pdx}$  samples.

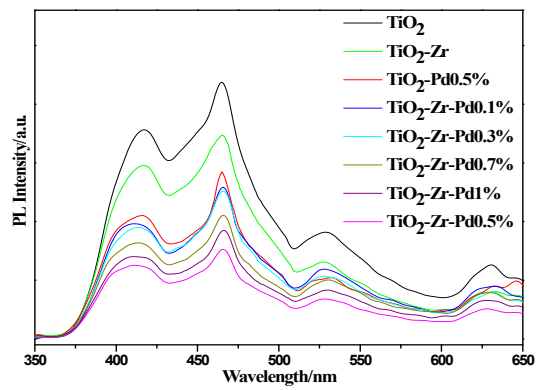

**Figure S5.** Photoluminescence spectra for  $\text{TiO}_2$ ,  $\text{TiO}_2\text{-Pd}0.5\%$ ,  $\text{TiO}_2\text{-Zr}$  and  $\text{TiO}_2\text{-Zr-Pdx}$  samples.

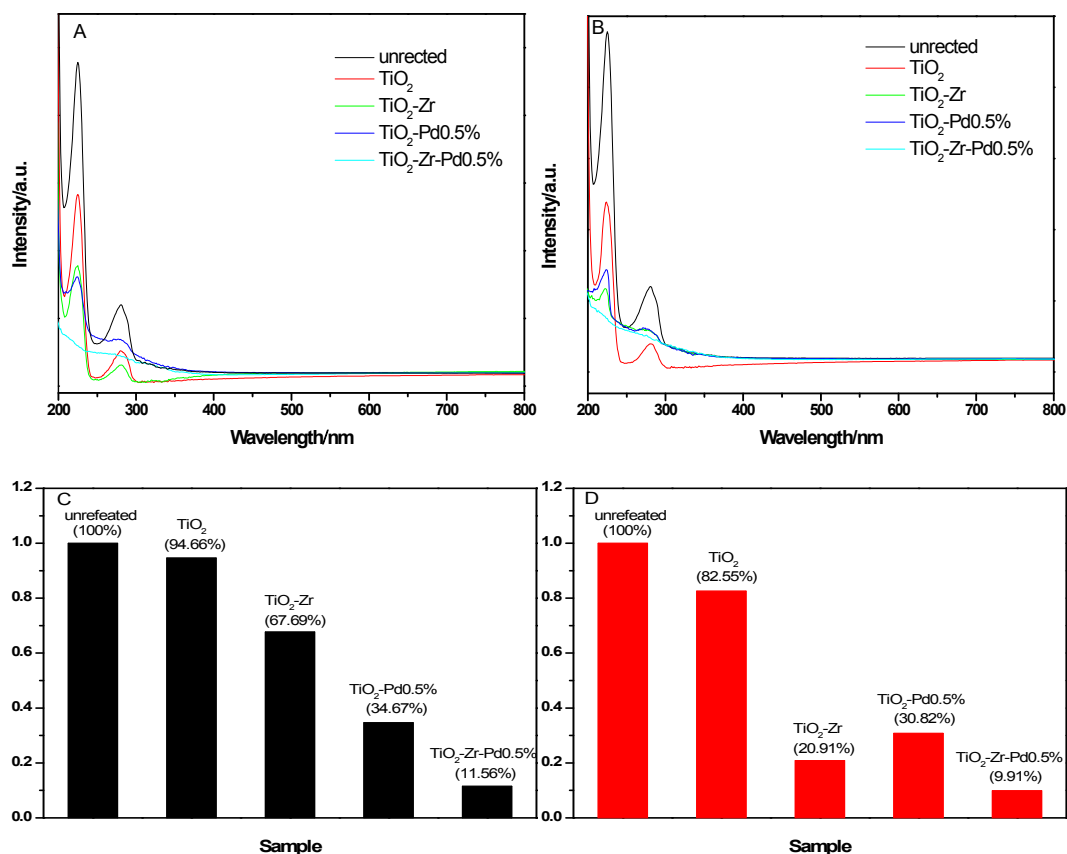

**Figure S6.** UV-Vis absorption spectra of the resultant reaction product under Vis irradiation (A) and UV irradiation (B) and the corresponding peak area of the absorption spectra (C is under Vis irradiation and D is UV irradiation) for TiO<sub>2</sub>, TiO<sub>2</sub>-Pd0.5%, TiO<sub>2</sub>-Zr and TiO<sub>2</sub>-Zr-Pdx samples.

The resultant reaction product can be measured by the UV-Vis absorption spectra after the irradiation. The absorption corresponding to the benzene ring (230 nm) decreases in the order of TiO<sub>2</sub> < TiO<sub>2</sub>-Zr < TiO<sub>2</sub>-Pd0.5% < TiO<sub>2</sub>-Zr-Pd0.5% under Vis irradiation. Moreover, we use the peak areas of absorption spectra to represent the resultant amount of organic pollutants. It is found the fewest organic pollutants are detected for TiO<sub>2</sub>-Zr-Pd0.5%, which is consistent with the discussion above (Figure 1).

**Table S1.** Lattice parameters, Cell volume, Crystal size and Specific surface area for TiO<sub>2</sub>, TiO<sub>2</sub>-Pd0.5%, TiO<sub>2</sub>-Zr and TiO<sub>2</sub>-Zr-Pdx samples.

| Sample                      | Lattice parameters |       | Cell<br>volume/Å <sup>3</sup> | Crystal size/nm | Specific<br>Surface Area |
|-----------------------------|--------------------|-------|-------------------------------|-----------------|--------------------------|
|                             | a,b/Å              | c/Å   |                               |                 |                          |
| TiO <sub>2</sub>            | 3.783              | 9.501 | 136.0                         | 13.0            | 63.8                     |
| TiO <sub>2</sub> -Pd0.5%    | 3.781              | 9.499 | 135.8                         | 12.6            | 75.4                     |
| TiO <sub>2</sub> -Zr        | 3.802              | 9.540 | 137.9                         | 11.3            | 85.1                     |
| TiO <sub>2</sub> -Zr-Pd0.1% | 3.802              | 9.554 | 138.1                         | 11.8            | 83.3                     |
| TiO <sub>2</sub> -Zr-Pd0.3% | 3.803              | 9.542 | 138.0                         | 11.1            | 87.0                     |
| TiO <sub>2</sub> -Zr-Pd0.5% | 3.804              | 9.551 | 138.2                         | 12.3            | 81.0                     |
| TiO <sub>2</sub> -Zr-Pd0.7% | 3.803              | 9.562 | 138.3                         | 12.0            | 83.1                     |
| TiO <sub>2</sub> -Zr-Pd1%   | 3.801              | 9.573 | 138.3                         | 11.5            | 84.4                     |

**Table S2.** Eg for all the samples.

| sample  | TiO <sub>2</sub> | TiO <sub>2</sub> -Zr | TiO <sub>2</sub> -Pd0.1% | TiO <sub>2</sub> Pd0.5% | TiO <sub>2</sub> -Zr-Pd0.1% | TiO <sub>2</sub> -Zr-Pd0.3% | TiO <sub>2</sub> -Zr-Pd0.5% | TiO <sub>2</sub> -Zr-Pd0.7% | TiO <sub>2</sub> -Zr-Pd1% |
|---------|------------------|----------------------|--------------------------|-------------------------|-----------------------------|-----------------------------|-----------------------------|-----------------------------|---------------------------|
| Eg (eV) | 3.10             | 3.08                 | 3.08                     | 3.10                    | 3.08                        | 3.08                        | 3.08                        | 3.06                        | 3.04                      |

**Table S3.** The lattice parameters and cell volume of TiO<sub>2</sub>-Zr5%-Pd0.5%, TiO<sub>2</sub>-Zr10%-Pd0.5% and TiO<sub>2</sub>-Zr15%-Pd0.5%.

| Sample                         | Lattice parameters |       | Cell volume /Å <sup>3</sup> |
|--------------------------------|--------------------|-------|-----------------------------|
|                                | a,b/ Å             | c/Å   |                             |
| TiO <sub>2</sub> -Zr5%-Pd0.5%  | 3.805              | 9.532 | 138.0                       |
| TiO <sub>2</sub> -Zr10%-Pd0.5% | 3.804              | 9.551 | 138.2                       |
| TiO <sub>2</sub> -Zr15%-Pd0.5% | 3.819              | 9.784 | 142.7                       |

We have calculated the lattice parameters and cell volume of TiO<sub>2</sub>-Zr5%-Pd0.5% and TiO<sub>2</sub>-Zr15%-Pd0.5%. And it

is clear that the lattice parameters and cell volume increase with the Zr content.
